# Supplementary material for: Network analysis and transcriptome profiling in peripheral blood mononuclear cells of patients with rheumatoid arthritis
Source: PubMed Central journal article supplement — Exp Ther Med. 2020 Dec 25;21(2):170. doi: 10.3892/etm.2020.9601 (PMC7792483; doi:10.3892/etm.2020.9601), 2020-12-25
Supplement: Supplementary_Data.pdf [file Supplementary_Data.pdf]

Figure S1. KEGG pathways of the differentially expressed mRNAs. The abscissa displays the enrichment factor and the ordinate presents the pathway terms with the highest degree of enrichment (the 20 most enriched ones are selected for display).  $P < 0.05$  was considered to indicate a statistically significant difference. The colour indicates the P-value with red indicating the most significant enrichment. The size of the dots indicates the number of differentially expressed genes accumulated in the term. KEGG, Kyoto Encyclopedia of Genes and Genomes.

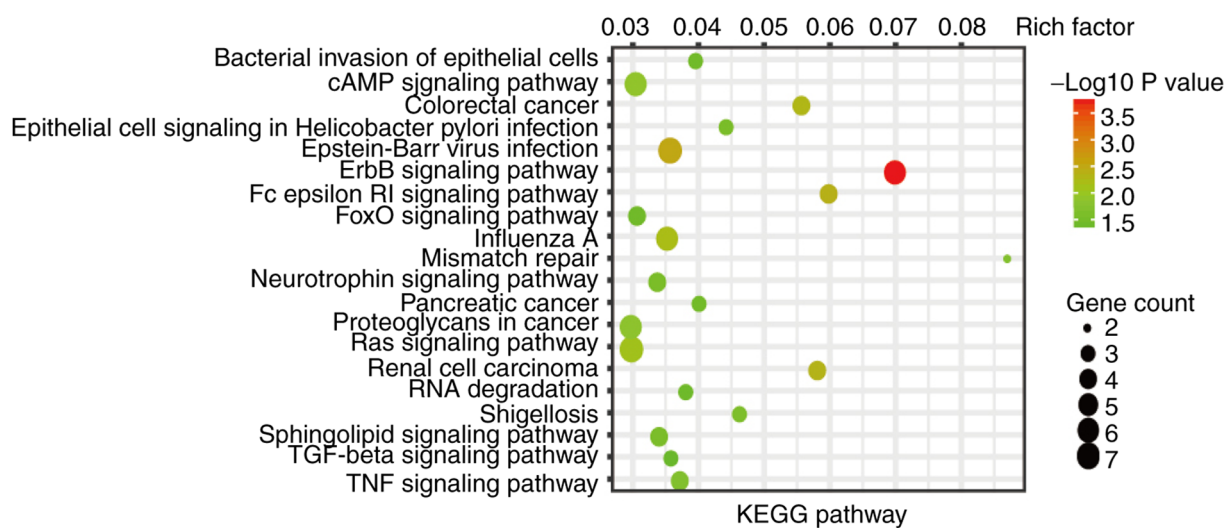



Table SI. Enriched Kyoto Encyclopedia of Genes and Genomes pathways of differentially expressed long non-coding RNAs.

| Pathway ID | Pathway name                                 | FDR    |
|------------|----------------------------------------------|--------|
| hsa04640   | Hematopoietic cell lineage                   | 0.0342 |
| hsa04657   | IL-17 signaling pathway                      | 0.0040 |
| hsa04658   | Th1 and Th2 cell differentiation             | 0.0039 |
| hsa04659   | Th17 cell differentiation                    | 0.0014 |
| hsa04668   | TNF signaling pathway                        | 0.0337 |
| hsa04672   | Intestinal immune network for IgA production | 0.0014 |
| hsa04940   | Type I diabetes mellitus                     | 0.0143 |
| hsa04978   | Mineral absorption                           | 0.0003 |
| hsa05140   | Leishmaniasis                                | 0.0064 |
| hsa05145   | Toxoplasmosis                                | 0.0143 |
| hsa05166   | HTLV-I infection                             | 0.0040 |
| hsa05168   | Herpes simplex infection                     | 0.0191 |
| hsa05169   | Epstein-Barr virus infection                 | 0.0342 |
| hsa05310   | Asthma                                       | 0.0112 |
| hsa05321   | Inflammatory bowel disease                   | 0.0003 |
| hsa05332   | Graft-versus-host disease                    | 0.0004 |
| hsa00051   | Fructose and mannose metabolism              | 0.0007 |
| hsa00190   | Oxidative phosphorylation                    | 0.0131 |
| hsa00230   | Purine metabolism                            | 0.0410 |
| hsa00240   | Pyrimidine metabolism                        | 0.0038 |
| hsa00310   | Lysine degradation                           | 0.0140 |
| hsa00510   | N-Glycan biosynthesis                        | 0.0370 |
| hsa00514   | Other types of O-glycan biosynthesis         | 0.0112 |
| hsa00515   | Mannose type O-glycan biosynthesis           | 0.0331 |
| hsa00520   | Amino sugar and nucleotide sugar metabolism  | 0.0037 |
| hsa00562   | Inositol phosphate metabolism                | 0.0112 |
| hsa00730   | Thiamine metabolism                          | 0.0135 |
| hsa00970   | Aminoacyl-tRNA biosynthesis                  | 0.0079 |
| hsa01521   | EGFR tyrosine kinase inhibitor resistance    | 0.0040 |
| hsa01522   | Endocrine resistance                         | 0.0159 |
| hsa01524   | Platinum drug resistance                     | 0.0258 |
| hsa03013   | RNA transport                                | 0.0042 |
| hsa03015   | mRNA surveillance pathway                    | 0.0286 |
| hsa03018   | RNA degradation                              | 0.0159 |
| hsa03040   | Spliceosome                                  | 0.0001 |
| hsa03050   | Proteasome                                   | 0.0358 |
| hsa03410   | Base excision repair                         | 0.0033 |
| hsa03420   | Nucleotide excision repair                   | 0.0018 |
| hsa03430   | Mismatch repair                              | 0.0331 |
| hsa03440   | Homologous recombination                     | 0.0053 |
| hsa03450   | Non-homologous end-joining                   | 0.0252 |
| hsa03460   | Fanconi anemia pathway                       | 0.0331 |
| hsa04010   | MAPK signaling pathway                       | 0.0125 |
| hsa04012   | ErbB signaling pathway                       | 0.0191 |
| hsa04064   | NF-kappa B signaling pathway                 | 0.0220 |
| hsa04066   | HIF-1 signaling pathway                      | 0.0040 |
| hsa04068   | FoxO signaling pathway                       | 0.0008 |
| hsa04070   | Phosphatidylinositol signaling system        | 0.0346 |
| hsa04071   | Sphingolipid signaling pathway               | 0.0001 |
| hsa04072   | Phospholipase D signaling pathway            | 0.0038 |
| hsa04110   | Cell cycle                                   | 0.0001 |
| hsa04114   | Oocyte meiosis                               | 0.0217 |
| hsa04115   | p53 signaling pathway                        | 0.0005 |
| hsa04120   | Ubiquitin mediated proteolysis               | 0.0001 |

Table SI. Continued.

| Pathway ID | Pathway name                                                      | FDR    |
|------------|-------------------------------------------------------------------|--------|
| hsa04130   | SNARE interactions in vesicular transport                         | 0.0252 |
| hsa04136   | Autophagy - other eukaryotes                                      | 0.0358 |
| hsa04137   | Mitophagy - animal                                                | 0.0004 |
| hsa04140   | Autophagy - animal                                                | 0.0001 |
| hsa04141   | Protein processing in endoplasmic reticulum                       | 0.0001 |
| hsa04142   | Lysosome                                                          | 0.0008 |
| hsa04144   | Endocytosis                                                       | 0.0000 |
| hsa04145   | Phagosome                                                         | 0.0038 |
| hsa04150   | mTOR signaling pathway                                            | 0.0036 |
| hsa04151   | PI3K-Akt signaling pathway                                        | 0.0307 |
| hsa04152   | AMPK signaling pathway                                            | 0.0008 |
| hsa04210   | Apoptosis                                                         | 0.0010 |
| hsa04211   | Longevity regulating pathway - mammal                             | 0.0036 |
| hsa04215   | Apoptosis - multiple species                                      | 0.0305 |
| hsa04216   | Ferroptosis                                                       | 0.0066 |
| hsa04218   | Cellular senescence                                               | 0.0000 |
| hsa04360   | Axon guidance                                                     | 0.0344 |
| hsa04370   | VEGF signaling pathway                                            | 0.0009 |
| hsa04371   | Apelin signaling pathway                                          | 0.0038 |
| hsa04380   | Osteoclast differentiation                                        | 0.0000 |
| hsa04510   | Focal adhesion                                                    | 0.0005 |
| hsa04520   | Adherens junction                                                 | 0.0007 |
| hsa04611   | Platelet activation                                               | 0.0005 |
| hsa04621   | NOD-like receptor signaling pathway                               | 0.0031 |
| hsa04658   | Th1 and Th2 cell differentiation                                  | 0.0327 |
| hsa04659   | Th17 cell differentiation                                         | 0.0003 |
| hsa04660   | T cell receptor signaling pathway                                 | 0.0048 |
| hsa04662   | B cell receptor signaling pathway                                 | 0.0008 |
| hsa04664   | Fc epsilon RI signaling pathway                                   | 0.0003 |
| hsa04666   | Fc gamma R-mediated phagocytosis                                  | 0.0007 |
| hsa04668   | TNF signaling pathway                                             | 0.0358 |
| hsa04722   | Neurotrophin signaling pathway                                    | 0.0005 |
| hsa04730   | Long-term depression                                              | 0.0451 |
| hsa04810   | Regulation of actin cytoskeleton                                  | 0.1030 |
| hsa04910   | Insulin signaling pathway                                         | 0.0095 |
| hsa04914   | Progesterone-mediated oocyte maturation                           | 0.0159 |
| hsa04915   | Estrogen signaling pathway                                        | 0.0314 |
| hsa04919   | Thyroid hormone signaling pathway                                 | 0.0225 |
| hsa04922   | Glucagon signaling pathway                                        | 0.0473 |
| hsa04926   | Relaxin signaling pathway                                         | 0.0258 |
| hsa04931   | Insulin resistance                                                | 0.0409 |
| hsa04932   | Non-alcoholic fatty liver disease                                 | 0.0062 |
| hsa04933   | AGE-RAGE signaling pathway in diabetic complications              | 0.0280 |
| hsa04962   | Vasopressin-regulated water reabsorption                          | 0.0079 |
| hsa05010   | Alzheimers disease                                                | 0.0056 |
| hsa05012   | Parkinsons disease                                                | 0.0112 |
| hsa05016   | Huntingtons disease                                               | 0.0004 |
| hsa05100   | Bacterial invasion of epithelial cells                            | 0.0007 |
| hsa05120   | Epithelial cell signaling in <i>Helicobacter pylori</i> infection | 0.0130 |
| hsa05131   | Shigellosis                                                       | 0.0008 |
| hsa05132   | Salmonella infection                                              | 0.0008 |
| hsa05133   | Pertussis                                                         | 0.0436 |
| hsa05134   | Legionellosis                                                     | 0.0286 |
| hsa05140   | Leishmaniasis                                                     | 0.0158 |

Table SI. Continued.

| Pathway ID | Pathway name                                    | FDR    |
|------------|-------------------------------------------------|--------|
| hsa05142   | Chagas disease (American trypanosomiasis)       | 0.0018 |
| hsa05145   | Toxoplasmosis                                   | 0.0014 |
| hsa05152   | Tuberculosis                                    | 0.0038 |
| hsa05161   | Hepatitis B                                     | 0.0007 |
| hsa05165   | Human papillomavirus infection                  | 0.0008 |
| hsa05166   | HTLV-I infection                                | 0.0001 |
| hsa05167   | Kaposi sarcoma-associated herpesvirus infection | 0.0008 |
| hsa05168   | Herpes simplex infection                        | 0.0040 |
| hsa05169   | Epstein-Barr virus infection                    | 0.0008 |
| hsa05200   | Pathways in cancer                              | 0.0082 |
| hsa05203   | Viral carcinogenesis                            | 0.0008 |
| hsa05205   | Proteoglycans in cancer                         | 0.0056 |
| hsa05210   | Colorectal cancer                               | 0.0013 |
| hsa05211   | Renal cell carcinoma                            | 0.0005 |
| hsa05212   | Pancreatic cancer                               | 0.0004 |
| hsa05213   | Endometrial cancer                              | 0.0036 |
| hsa05214   | Glioma                                          | 0.0078 |
| hsa05215   | Prostate cancer                                 | 0.0008 |
| hsa05219   | Bladder cancer                                  | 0.0346 |
| hsa05220   | Chronic myeloid leukemia                        | 0.0003 |
| hsa05221   | Acute myeloid leukemia                          | 0.0039 |
| hsa05222   | Small cell lung cancer                          | 0.0036 |
| hsa05223   | Non-small cell lung cancer                      | 0.0017 |
| hsa05230   | Central carbon metabolism in cancer             | 0.0105 |
| hsa05231   | Choline metabolism in cancer                    | 0.0090 |
| hsa05416   | Viral myocarditis                               | 0.0451 |

Hsa, Homo sapiens; FDR, false discovery rate.
